# Supplementary material for: A novel mechanism for poisoning of metal oxide SCR catalysts: base–acid explanation correlated with redox properties
Source: Royal Society of Chemistry journal article supplement (doi:10.1039/c4cc02991g), 2014-01-01
Supplement: c4cc02991g1.pdf [file c4cc02991g1.pdf]

## **A novel mechanism for poisoning of metal oxides SCR catalyst: base-acid explanation correlated with redox property**

Huazhen Chang<sup>a</sup>, Junhua Li<sup>a,b\*</sup>, Wenkang Su<sup>a</sup>, Yuankai Shao<sup>a</sup>, Jiming Hao<sup>a,b</sup>

<sup>a</sup> State Key Joint Laboratory of Environment Simulation and Pollution Control (SKLESPC), School of Environment, Tsinghua University, Beijing, 100084, China.

<sup>b</sup> State Environmental Protection Key Laboratory of Sources and Control of Air Pollution Complex, Beijing 100084, China

**Electronic Supplementary Information**

## Catalyst preparation

The CeMo/Ti and VW/Ti catalysts were prepared by impregnation method. Degussa AEROSIL TiO<sub>2</sub> P25 was used as support. 10 wt.% CeO<sub>2</sub>-MoO<sub>3</sub>/TiO<sub>2</sub> catalyst (the molar ratio of Ce:Mo=2:1, loading 10 wt.% totally) was prepared by impregnating TiO<sub>2</sub> powder with an aqueous solution of cerium nitrate (Ce(NO<sub>3</sub>)<sub>3</sub>·6H<sub>2</sub>O), ammonium molybdate ((NH<sub>4</sub>)<sub>6</sub>Mo<sub>7</sub>O<sub>24</sub>·4H<sub>2</sub>O) and oxalic acid (H<sub>2</sub>C<sub>2</sub>O<sub>4</sub>·2H<sub>2</sub>O), stirred for 4 h, then dried at 120 °C and calcined at 500 °C for 4 h in air. For comparison, the V<sub>2</sub>O<sub>5</sub>-WO<sub>3</sub>/TiO<sub>2</sub> catalyst with 1 wt.% V<sub>2</sub>O<sub>5</sub> and 5 wt.% WO<sub>3</sub> was also prepared by the same impregnation method using NH<sub>4</sub>VO<sub>3</sub>, (NH<sub>4</sub>)<sub>10</sub>W<sub>12</sub>O<sub>41</sub>, and H<sub>2</sub>C<sub>2</sub>O<sub>4</sub>·2H<sub>2</sub>O as precursors.

The Mn-Ce-O catalyst was prepared by co-precipitation method. Manganese nitrate and cerium nitrate were employed as precursors for catalyst components; ammonium carbonate was utilized as a precipitator. The mash obtained from co-precipitation underwent ultrasonication, filtration, thorough washing with DI water, desiccation, and final calcination at 500 °C for 6 h in static air. MnO<sub>2</sub> were synthesized by hydrothermal methods. KMnO<sub>4</sub> and MnSO<sub>4</sub>·H<sub>2</sub>O were mixed in distilled water and then hydrothermal treated in a Teflon-lined autoclave at 160 °C for 12h.

## Characterization of NH<sup>4+</sup> and Cl<sup>-</sup> after SCR reaction with HCl

After SCR activity test with HCl, the CeMo/Ti and VW/Ti samples were characterized by ICP. 0.45 wt.% of Cl<sup>-</sup> and 0.15 wt.% of NH<sup>4+</sup> were found in CeMo/Ti sample; meanwhile, 0.10 wt.% of Cl<sup>-</sup> and 0.91 wt.% of NH<sup>4+</sup> were found in VW/Ti sample.

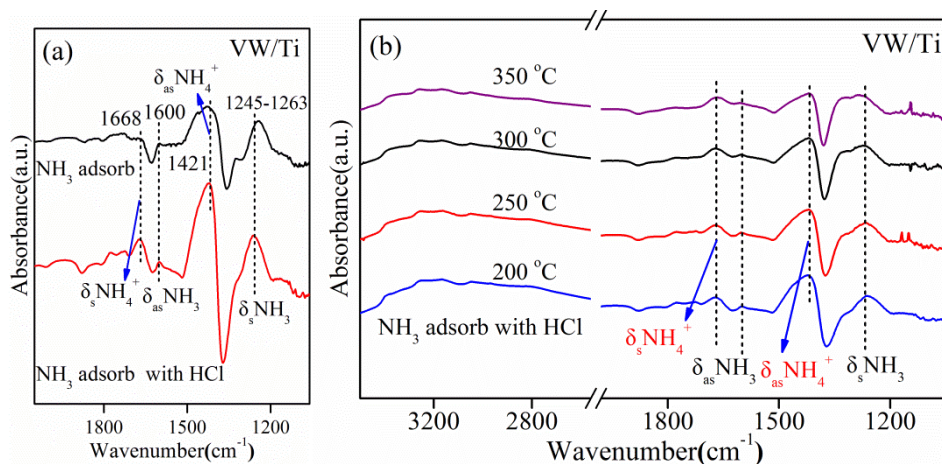

Fig. S1 DRIFT spectra of the effect of HCl on NH<sub>3</sub> adsorption over VW/Ti catalyst at different temperatures.

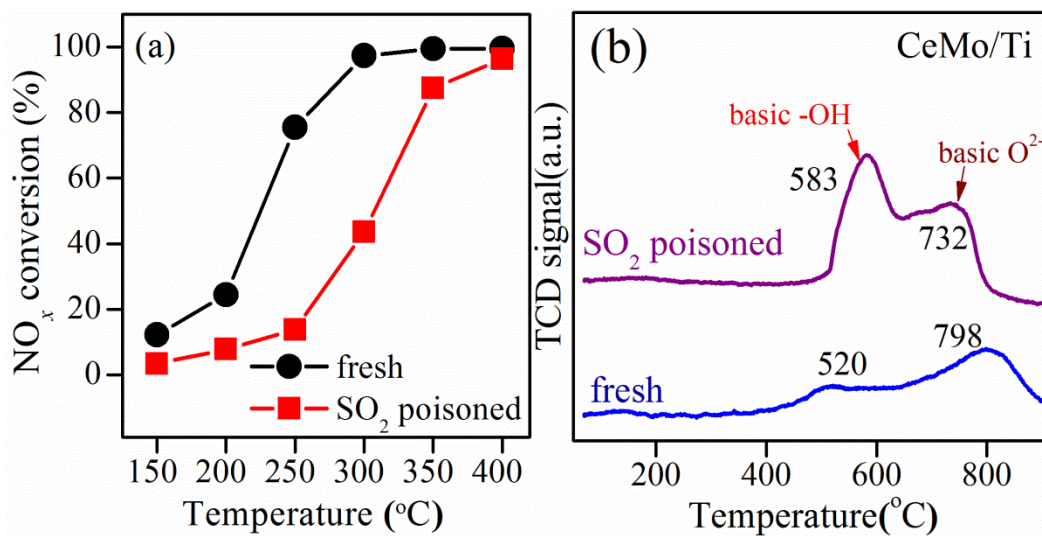

Fig. S2 The effect of SO<sub>2</sub> poisoning on the SCR activity over CeMo/Ti catalyst (a); and CO<sub>2</sub>-TPD curves of fresh and SO<sub>2</sub> poisoned CeMo/Ti catalysts.

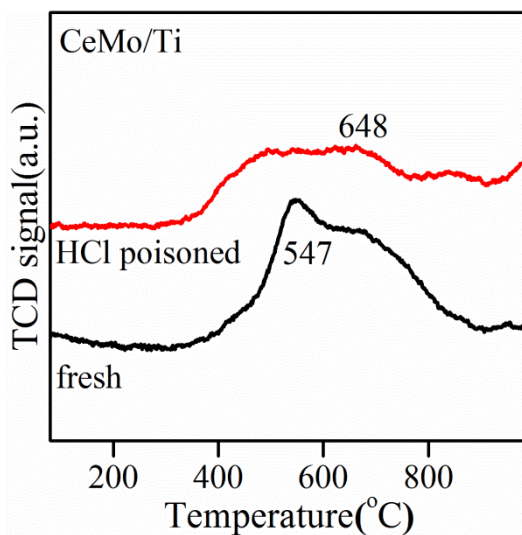

Fig. S3 The H<sub>2</sub>-TPR spectra of CeMo/Ti catalyst before and after HCl poisoning.

The H<sub>2</sub> temperature programmed reduction (H<sub>2</sub>-TPR) was carried out with a Micromeritics AutoChem II 2920 instrument. Prior to H<sub>2</sub>-TPR experiment, the sample was preheated in a He flow at 450 °C for 1 h. The consumed amount of H<sub>2</sub> as a function of temperature was evaluated by the signal of Thermal Conductivity Detector (TCD). The fresh CeMo/Ti sample showed a broad band at 400-800 °C, with a sharp peak at 547 °C. After HCl poisoning, the broad band could also be seen, but the peak disappeared.

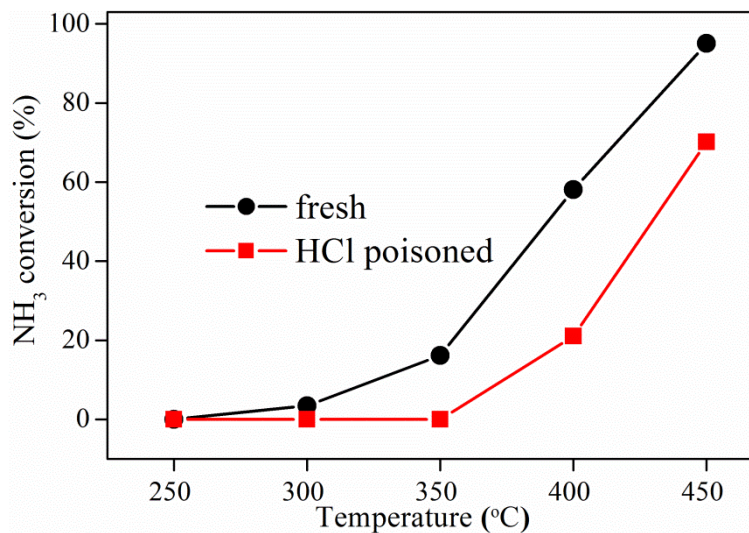

Fig. S4 The effect of HCl poisoning on NH<sub>3</sub> conversion in NH<sub>3</sub> oxidation over CeMo/Ti catalyst.

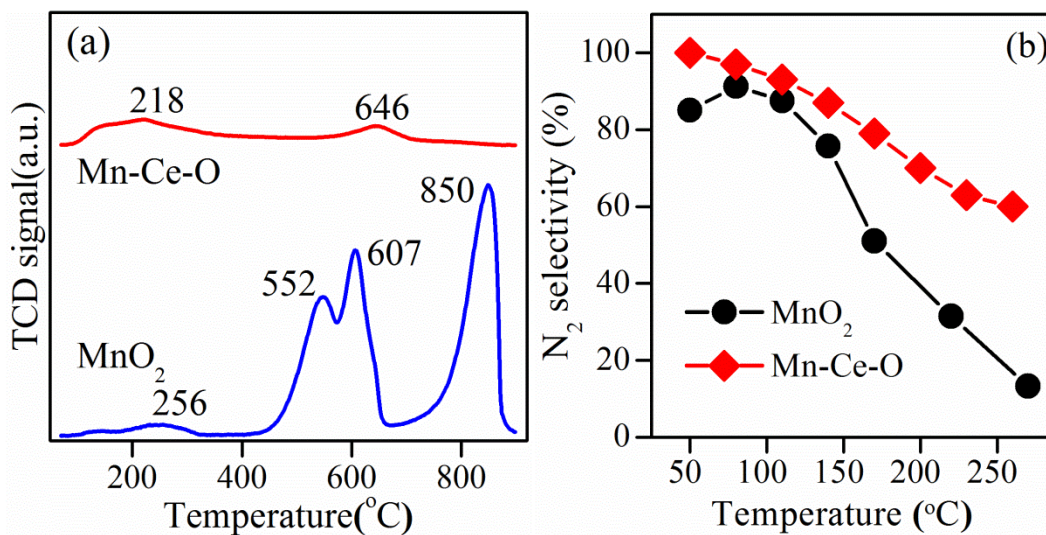

Fig. S5 (a) CO<sub>2</sub>-TPD curves of MnO<sub>2</sub> and Mn-Ce-O catalysts; (b) N<sub>2</sub> selectivity vs temperature in SCR reaction over two catalysts.

Table. S1 BET specific surface area of HCl and NH<sub>4</sub>Cl poisoned catalysts.

| Samples |                             | BET surface area (m <sup>2</sup> g <sup>-1</sup> ) |
|---------|-----------------------------|----------------------------------------------------|
| VW/Ti   | fresh                       | 95.00                                              |
|         | HCl poisoned                | 91.45                                              |
|         | NH <sub>4</sub> Cl poisoned | 94.01                                              |
| CeMo/Ti | fresh                       | 53.24                                              |
|         | HCl poisoned                | 51.39                                              |
|         | NH <sub>4</sub> Cl poisoned | 54.99                                              |
